# Supplementary material
Source: Springer Nature journal article supplement (https://www.springermedizin.de/resource/supplementary/13012_2010_333_MOESM11_ESM.pdf/9629794)
Supplement: MOESM11 [file 9629794]

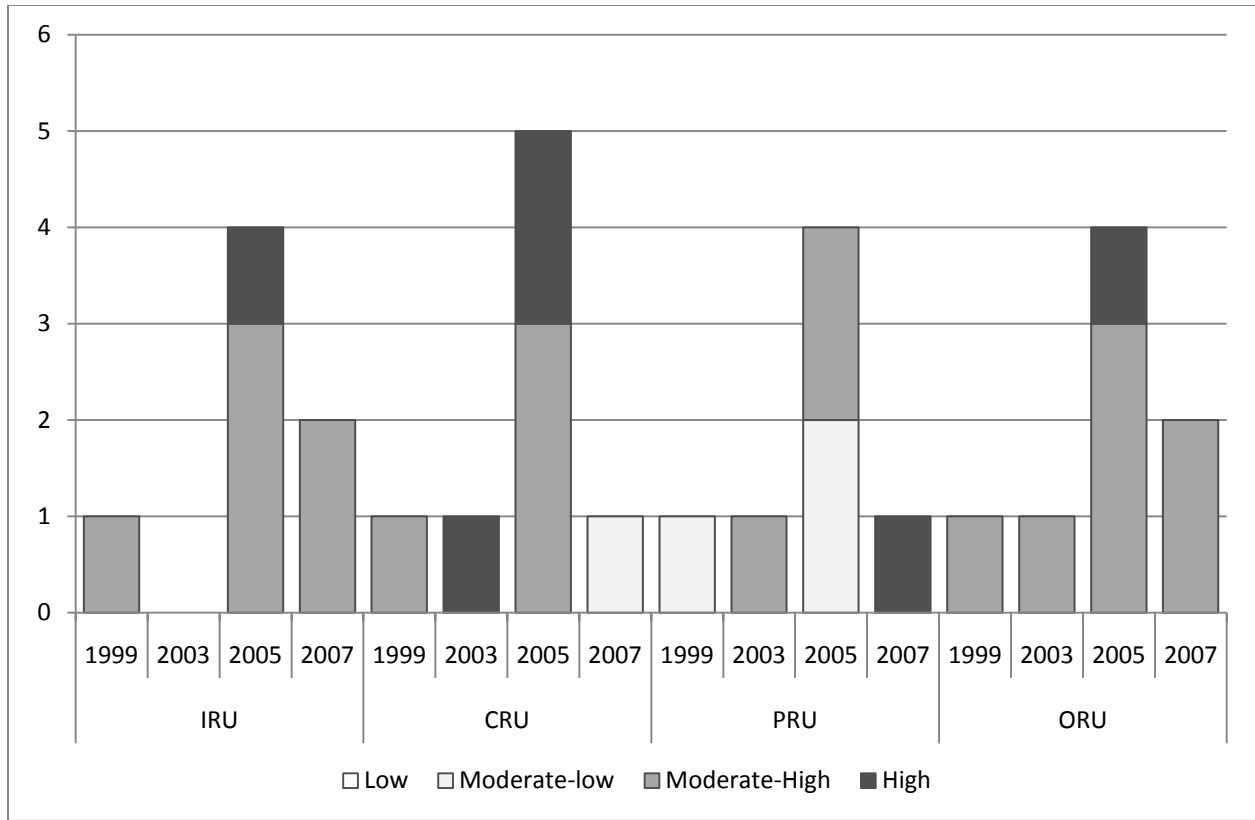

One study (Milner, 2005) reports three levels of use for each *kind* of research, based on different categories of staff (nurses, staff, managers and educators). Profetto-McGrath (2003) did not report instrumental research use and Estabrooks (2007) did not report on persuasive or conceptual research use. Thus, six articles account for 26 measures reported in this table.

**Figure 5. Extent of use of kinds of research (N=6 articles)**
